1 **Using null models to compare bacterial and microeukaryotic metacommunity assembly**  
2 **under shifting environmental conditions**

3

4 Running title: Metacommunities under shifting environment

5

6 **Máté Vass\*, Anna J. Székely, Eva S. Lindström, Silke Langenheder**

7 Department of Ecology and Genetics/Limnology, Uppsala University, Sweden

8 \*corresponding author's e-mail address: [mate.vass@ebc.uu.se](mailto:mate.vass@ebc.uu.se)

9

10 **Abstract**

11 Temporal variations in microbial metacommunity structure and assembly processes in  
12 response to shifts in environmental conditions are poorly understood. Hence, we conducted a  
13 temporal field study by sampling rock pools in four-day intervals during a 5-week period that  
14 included strong changes in environmental conditions due to intensive rain. We characterized  
15 bacterial and microeukaryote communities by 16S and 18S rRNA gene sequencing,  
16 respectively. Using a suite of null-model approaches to assess dynamics in community  
17 assembly, we found that strong changes in environmental conditions induced small but  
18 significant temporal changes in assembly processes and triggered different responses in  
19 bacterial and microeukaryotic metacommunities, promoting distinct selection processes.  
20 Incidence-based approaches showed that the assemblies of both communities were mainly  
21 governed by stochastic processes. In contrast, abundance-based methods indicated the  
22 dominance of historical contingency and unmeasured factors in case of bacteria and  
23 microeukaryotes, respectively, which we distinguished from dispersal-related processes using  
24 additional tests. Taken together, our study highlights that community assembly processes are  
25 not static, and the relative importance of different assembly processes can vary under different  
26 conditions and between different microbial groups.

27 **Introduction**

28

29 Different assembly processes such as environmental selection, dispersal and/or  
30 stochastic processes can simultaneously influence community composition [1]. The relative  
31 importance of the different processes is highly context-dependent and dynamic and may  
32 therefore vary in importance over time [2–5] as a consequence of processes such as ecological  
33 succession [4, 6], seasonality [3, 5, 7] or changes in connectivity between sites [8, 9]. Despite  
34 the increased recognition that community assembly processes are not static, the majority of  
35 studies is based on snapshot sampling which cannot adequately capture their dynamics [7].

36 Besides contemporary changes in environmental conditions and dispersal processes  
37 [10], past environmental conditions and dispersal events (i.e., historical contingency) may  
38 also influence the temporal dynamics of assembly processes [11–13]. For instance, changes in  
39 the variation in environmental heterogeneity could affect the relative importance of species-  
40 sorting or selection processes [8], while changes in dispersal rates could affect the  
41 possibilities for mass effects [14] or the extent of dispersal limitation [15]. Further, the  
42 importance of historical contingency may also depend on the environmental context. For  
43 example, priority effects – the impact of particular species on community development due to  
44 prior arrival at a site – may be affected by environmental disturbances that initiate  
45 colonization events that intensify the importance of the phenomenon [11]. Several studies  
46 detected a trajectory from stochastic to deterministic assembly processes in time following a  
47 disturbance [16, 17], which might reflect effects of initially strong, but transient priority  
48 effects that diminish over time as more species arrive and establish in the post-disturbance  
49 community. Finally, the probability of priority effects may also increase when productivity is  
50 high [18], because the growth of early colonizers is promoted [11].

51           Only a few studies have directly compared assembly mechanisms between different  
52 groups of microorganisms such as bacteria and microeukaryotes. Based on the differences in  
53 e.g., cell sizes, generation times and life history traits, differences in assembly processes are  
54 expected between these two groups [19–21]. For instance, it has been suggested that marine  
55 protist communities are governed by species-sorting to a greater extent than are marine  
56 bacterial communities [22, 23], while on the contrary, other studies indicated the opposite  
57 [21]. Microeukaryotes have been suggested to be mainly shaped by stochastic mechanisms  
58 (i.e. drift) [21, 24] and to be more subject to the effect of dispersal than bacteria [25]. Hence,  
59 there are to date conflicting results on how assembly processes differ and persist through time  
60 in bacterial and microeukaryotic communities.

61           The statistical ‘toolbox’ that is currently used to gain insights into the importance of  
62 different community assembly processes consists of several complementary approaches that  
63 all have their own strengths and limitations. Recently, null model approaches that  
64 quantitatively compare assembly processes have been increasingly used [26, 27]. For  
65 example, the elements of metacommunity structure (EMS) method allows to distinguish  
66 randomly assembled communities from those assembled by species-sorting processes [28,  
67 29]. The incidence-based (Raup-Crick) beta-diversity ( $\beta_{RC}$ ) [30] has been used to differentiate  
68 between deterministic and stochastic assembly processes [18, 31]. In addition, based on the  
69 assumption that phylogenetic relatedness is indicative of shared environmental response traits  
70 [32], null model approaches have been extended to integrate phylogenetic information [33].  
71 Specifically, Stegen et al. [15, 27] have combined null model approaches based on  
72 phylogenetic and abundance-based (Raup-Crick) beta-diversity ( $\beta_{RCbray}$ ) measures to  
73 quantitatively estimate the relative importance of processes such as selection, drift, dispersal  
74 limitation and mass effects. Furthermore, this quantitative process estimate (QPE) method

75 also differentiates between heterogenous/variable (i.e., beta-diversity enhancing) and  
76 homogeneous (i.e., beta-diversity diminishing) selection processes.

77 We carried out an extensive field study of bacterial and microeukaryotic communities  
78 in rock pools, which are particularly variable habitats both in space and time. The above-  
79 mentioned statistical approaches were applied to assess the temporal changes in community  
80 assembly processes. We hypothesized that temporal changes in the importance of different  
81 assembly processes should occur in dependence on changes in environmental conditions and,  
82 further, that these changes differ between bacterial and microeukaryotic communities.

83

## 84 **Material and methods**

85

### 86 *Sampling procedure*

87 Samples were taken from 20 neighboring rock pools – referred to as a  
88 ‘metacommunity’ – located along the Baltic Sea coast on the island of Gräsö, Sweden  
89 (60°29'54.0" N, 18°25'48.9" E) (Supplemental Fig. S1). The rock pools were sampled ten  
90 times, starting on 14 August 2015 and ending on 19 September 2015 in four-day intervals  
91 (Fig. S2). Four of the pools dried out at certain occasions during the sampling period.  
92 Intensive rain (starting August 31) occurred in the middle of the study period and separated a  
93 cooler wet period (air temperature (°C):  $13.98 \pm 1.35$ , precipitation (mm):  $3.97 \pm 6.94$ , wind  
94 speed (m/s):  $6.7 \pm 2.91$ ) from an extended dry period (air temperature (°C):  $17.71 \pm 0.98$ ,  
95 precipitation (mm):  $0.09 \pm 0.36$ , wind speed (m/s):  $5.6 \pm 1.61$ ) prior to the rain (Fig. S2).

96 Numerous abiotic and biotic variables were measured at each sampling occasion.  
97 Specifically, conductivity and temperature were measured using a WTW Conductometer  
98 (Cond 3210 SET 2 incl. TetraCon 325-3 measuring cell, Germany). Morphological  
99 parameters such as maximum length, width and depth were recorded for each pool.

100 Zooplankton samples were collected by filtering 2 l of water through a net (250  $\mu\text{m}$ ) and fixed  
101 with 70% ethanol for subsequent analysis. Five litres of water were collected in sterile plastic  
102 bottles and transported back to the laboratory where the samples were further processed. For  
103 quantification of bacterial abundance, samples were preserved with sterile-filtered  
104 formaldehyde at a final concentration of 2% and stored at 4 °C, while for bacterial and  
105 eukaryotic community analyses, pre-filtered (250  $\mu\text{m}$ ) water samples (100–500 ml) were  
106 collected by vacuum filtration onto 0.2  $\mu\text{m}$  47 mm membrane filters (Supor-200, Pall  
107 Corporation, Port Washington, NY, USA), and then, stored at –80 °C until further processing  
108 (see below).

109

#### 110 *Sample analysis*

111 Nutrient concentrations, such as total phosphorus (TP) and total nitrogen (TN) were  
112 measured spectrophotometrically (Perkin Elmer, Lambda 40, UV/VIS Spectrometer,  
113 Massachusetts, USA) and by catalytic thermal decomposition method (Shimadzu TNM-L,  
114 Kyoto, Japan), respectively according to standard procedures. Water colour was determined  
115 by measuring the absorbance of GF/C-filtered (Whatman® Glass microfiber filter, Sigma-  
116 Aldrich, USA) water at 436 nm. Chlorophyll-a was measured [34] as an estimator of the  
117 biomass of primary producers. Bacterial abundance was determined by flow cytometry as in  
118 Székely et al. [35] with the modification of using 2.27  $\mu\text{M}$  of SYTO 13 fluorescent nucleic  
119 acid stain (Invitrogen, Eugene, Oregon, USA).

120 For both bacterial and micro-eukaryotic community composition analyses, DNA  
121 extraction was performed from the membrane filters (PowerSoil DNA Isolation Kit, MoBio  
122 Laboratories Inc., Carlsbad, CA, USA). Bacterial 16S rRNA and eukaryotic 18S rRNA genes  
123 were amplified with bacterial (341F and 805R; [36]) and eukaryotic (574\*f and 1132r; [37])  
124 primer constructs, respectively. A full step-by-step protocol for the detailed two-step PCR

125 protocol has been deposited in the protocols.io repository  
126 ([dx.doi.org/10.17504/protocols.io.468gzhw](https://dx.doi.org/10.17504/protocols.io.468gzhw)). Amplicons were sequenced at the SciLifeLab  
127 SNP&SEQ Technology Platform (host by Uppsala University) using Illumina MiSeq v3  
128 sequencing chemistry. The raw sequencing data are available at the European Nucleotide  
129 Archive under accession number PRJEB30954. A detailed report of the data processing is  
130 provided in the supplementary material. The taxonomic composition of both datasets is  
131 visualized in Supplemental Figure S3 and S4.

132

### 133 *Statistical analysis*

134 All statistical analyses (see Fig. 1 for an overview) and visualizations were conducted  
135 in R version 3.3.2 [38].

136

### 137 Shifts in environmental conditions structuring communities

138 We excluded the four rock pools that occasionally dried out from all analyses. Then,  
139 we accounted for collinearity among standardized environmental variables by omitting highly  
140 collinear variables (Pearson  $|r| > 0.7$ ) based on Dormann et al. [39]. To select the variables  
141 most strongly associated with the variance of the observed communities, we applied  
142 redundancy analysis (RDA) on the Hellinger-transformed sequence data with forward  
143 selection (based on 999 permutations; variables retained at  $p < 0.05$ ), separately for bacteria  
144 and microeukaryotes (Fig. 1A) (see Results section for details). Differences in means and  
145 variances in selected variables between the dry and wet periods were tested using Kruskal-  
146 Wallis test and Levene's test, respectively. Additionally, to assess the separation between the  
147 two periods, permutational multivariate analysis of variance (PERMANOVA) with 999  
148 permutations was performed using the function 'adonis', further, the multivariate

149 homogeneity of group dispersions (PERMDISP) was tested using the function ‘betadisper’ in  
150 the package ‘vegan’ [40].

151

152 Elements of metacommunity structure (EMS)

153 Elements of metacommunity structure (EMS) were assessed for each time point  
154 following the frameworks developed by Leibold & Mikkelsen [28] and Presley et al. [29]  
155 (Fig. 1B). EMS enables to identify metacommunity properties that emerge in a site-by-species  
156 incidence matrix that is compared with null model expectations obtained through  
157 randomization [41]. Random matrices were produced by the ‘r1’ method (fixed-proportional  
158 null model). For this, the matrices (OTU table from 16S and 18S rRNA gene sequences,  
159 separately) were ordinated according to the primary axis via reciprocal averaging and then  
160 hierarchically analysed using three tests (coherence, turnover and boundary clumping) (for  
161 more details, see supplementary material). The package ‘metacom’ [41] was used to detect  
162 any pattern of metacommunity structure related to an idealized scenario (‘metacommunity  
163 type’). Following the suggested hierarchical framework of EMS, we specifically focused on  
164 the outcome of coherence tests (the number of embedded absences in the ordinated matrix and  
165 comparing the empirical value to a null distribution) in the subsequent statistical analyses  
166 since the majority of metacommunities were associated with checkerboard and random  
167 metacommunity types. Differences in the coherence (z-values) between the two periods (wet  
168 and dry) were tested using a Kruskal-Wallis test.

169

170 Incidence-based beta-diversity ( $\beta_{RC}$ )

171 The incidence-based (Raup-Crick) dissimilarity indices ( $\beta_{RC}$ ) were calculated to test  
172 whether community were stochastically or deterministically assembled (Fig. 1C). For this, we  
173 used the ‘raup\_crick’ function provided by Chase et al. [31]. When  $\beta_{RC}$  is not significantly



174 different from 0, the community is considered to be stochastically assembled.  $\beta_{RC}$  values close  
175 to  $-1$  indicate that communities are deterministically assembled and more similar to each  
176 other than expected by chance, whereas  $\beta_{RC}$  values close to  $+1$  indicate that deterministic  
177 processes favor dissimilar communities. The averaged dissimilarities for each time point and  
178 for each dataset (bacteria and microeukaryotes) were calculated separately. Differences in  $\beta_{RC}$   
179 between the two periods (wet and dry) were tested using a Kruskal-Wallis test.

180

181 Quantitative process estimates (QPE)

182 To quantify the relative importance of potential species sorting, dispersal limitation,  
183 drift and mass effects (we refer to this as ‘quantitative process estimates – QPE’ throughout  
184 the manuscript), we followed the two-step framework developed by Stegen et al. [27] (Fig.  
185 1D). This approach requires that phylogenetic distances (PD) among taxa reflect differences  
186 in the ecological niches they inhabit, thus, carry a phylogenetic signal. The presence of  
187 phylogenetic signals was tested using Mantel correlograms, as described in Stegen et al. [27].  
188 We found that niche differences caused by most of the environmental variables that structured  
189 communities according to the RDA results (see above) could induce turnover in phylogenetic  
190 community composition (Fig. S5, S6) and thereby fulfill the prerequisite of this framework.

191 To perform QPE based on pairwise comparisons, firstly, we determined to what extent  
192 the observed  $\beta_{MNTD}$  ( $\beta$ -mean-nearest-taxon-distance) deviated from the mean of the null  
193 distribution and evaluated significance using the  $\beta$ -Nearest Taxon Index ( $\beta_{NTI}$ ; difference  
194 between observed  $\beta_{MNTD}$  and the mean of the null distribution in units of SDs). If the  
195 observed  $\beta_{MNTD}$  value is significantly greater ( $\beta_{NTI} > 2$ ) or less ( $\beta_{NTI} < -2$ ) than the null  
196 expectation, the community is assembled by variable or homogeneous selection, respectively.  
197 If there is no significant deviation from the null expectation, the observed differences in  
198 phylogenetic community composition should be the result of dispersal limitation,

199 homogenizing dispersal (mass effect) or random drift. To estimate the relative importance of  
200 these processes, in the second step, the abundance-based (Raup-Crick) beta-diversity was  
201 calculated using pairwise Bray-Curtis dissimilarity ( $\beta_{\text{RCbray}}$ ) [27]. Based on the calculated  
202  $\beta_{\text{RCbray}}$ , we can assume that communities that were not selected in the first step, thus not  
203 assembled by selection, were structured by (i) dispersal limitation coupled with drift if  $\beta_{\text{RCbray}}$   
204  $> +0.95$ , (ii) homogenizing dispersal if  $\beta_{\text{RCbray}} < -0.95$ , or (iii) random processes acting alone  
205 (drift) if  $\beta_{\text{RCbray}}$  falls in between  $-0.95$  and  $+0.95$  (Fig. 1D). The first fraction,  $\beta_{\text{RCbray}} > +0.95$ ,  
206 may either indicate ‘true’ effects of dispersal limitation and/or history contingency that both  
207 result in more dissimilar communities than expected by chance. Hence, throughout the  
208 manuscript we use the term ‘dispersal limitation or historical contingency’ for this fraction.  
209 Differences in the QPE between the two periods (wet and dry) were tested using Kruskal-  
210 Wallis test.

211 To further assess whether ‘true’ dispersal limitation might have occurred, Mantel  
212 correlations between bacterial and microeukaryotic community dissimilarities ( $\beta_{\text{RCbray}}$ ) and  
213 geographic distances (Euclidean distances of geographical coordinates) were done using  
214 Pearson correlation and 999 permutations (Fig. 1E). By this, we could confirm any potential  
215 dispersal limitation and reject historical contingency if there is significant correlation between  
216  $\beta_{\text{RCbray}}$  and spatial distance. Further, Mantel correlation analyses between  $\beta_{\text{RCbray}}$  and  
217 environmental dissimilarities (Euclidean distances) were done to test if community  
218 dissimilarities were possibly due to selection by environmental factors that lack a  
219 phylogenetic signal (‘phylogenetically non-conserved selection’) and was therefore not  
220 detected in the first step but instead was retained in the second step of the QPE analysis. To  
221 determine if significant geographic distance effects were confounded by effects of spatially  
222 autocorrelated environmental variation and vice versa, partial Mantel tests were used with the

223 respective third matrix as covariate for time points where both correlations with geographic  
224 and environmental distances were significant.

225

226

## 227 **Results**

228

### 229 *Temporal variation in relevant environmental variables*

230 RDA with forward selection showed that conductivity ( $F = 11.37, p = 0.005$ ), water  
231 temperature ( $F = 2.99, p = 0.005$ ), nutrients (TP:  $F = 4.71, p = 0.005$  and TN:  $F = 2.04, p =$   
232  $0.005$ ), depth ( $F = 1.62, p = 0.03$ ) and Daphnia abundance ( $F = 1.62, p = 0.015$ ) correlated  
233 significantly with the variation in bacterial community composition. For microeukaryotes, the  
234 same variables and copepod abundance were significant (conductivity:  $F = 8.34, p = 0.005$ ;  
235 water temperature:  $F = 4.05, p = 0.005$ ; TN:  $F = 2.84, p = 0.005$ ; TP:  $F = 1.99, p = 0.005$ ;  
236 depth:  $F = 2.68, p = 0.005$ ; Daphnia abundance:  $F = 1.87, p = 0.015$ ; copepod abundance:  $F =$   
237  $2.04, p = 0.005$ ).

238 The temporal fluctuations of the selected variables followed similar patterns during  
239 the sampling period (Fig. 2). Specifically, we found that there was a clear separation point in  
240 the middle of the study period (31 August, between two sampling occasions on 30 August and  
241 3 September; dashed line in Fig. 2) from when on environmental conditions became more  
242 homogenous, i.e., the variance across the rock pools decreased (except in the case of depths  
243 and conductivity, although the latter one was marginally insignificant) (Table S1). These  
244 differences supported our separation of the study period and corresponding datasets into two  
245 periods, a dry and wet period (Figs 2 and S2). Consequently, the pools had higher mean water  
246 temperature, conductivity, zooplankton abundance, and nutrient concentrations, lower mean  
247 pool depth and more spatially heterogeneous conditions (high variance across pools) in the

248 dry compared to the wet period (Fig. 2, Table S1). This separation was further supported by  
249 PERMANOVA and PERMDISP analyses, which showed that the environmental conditions  
250 ( $F = 31.07$ ,  $p = 0.001$ ; Fig. S7) and their variances ( $F = 79.58$ ,  $p < 0.001$ ) clearly differed  
251 between the two periods. There were also significant differences in the composition of the  
252 bacterial and microeukaryotic communities of the dry and wet period but no difference in  
253 their homogeneity (beta-dispersion) (Figs S8, S9). Meanwhile, at the level of individual pools  
254 significant differences in community composition (PERMANOVA) were detected in some of  
255 the pools (7 out of 16) for bacteria and for most pools (15 out of 16) in the case of  
256 microeukaryotes (Table S2) without any difference in their beta-dispersion (PERMDISP,  
257 Table S3).

258

### 259 *Elements of metacommunity structure (EMS)*

260 In general, the observed z-value of coherence did not show wide variation across the  
261 bacterial and microeukaryotic datasets, which were shaped by random processes at the  
262 majority of the time points in both cases. Checkerboard pattern emerged at one occasion and  
263 two occasions for the bacterial and microeukaryotic metacommunities, respectively, while a  
264 nested, clumped species loss pattern was detected once during the wet period in bacteria (Fig.  
265 3, Table S4). Microeukaryotic metacommunities were also mainly characterized by random  
266 patterns, except for two occasions when checkerboard patterns occurred (Fig. 3). There was  
267 no significant change of coherence (z-values) over time in any of the observed datasets  
268 (bacteria:  $\chi_{\text{dry vs. wet}} = 0.884$ ,  $p = 0.347$ ; microeukaryotes:  $\chi_{\text{dry vs. wet}} = 3.153$ ,  $p = 0.076$ ),  
269 however, there were trends towards slightly higher coherence (z-values) in the wet period  
270 compared to the dry period, especially in the microeukaryote communities.

271

### 272 *Incidence-based beta-diversity ( $\beta_{RC}$ )*

273           Across the 16 rock pools the average  $\beta_{RC}$  varied within a narrow range, not deviating  
274 strongly from the null expectations (0.066–0.227 and –0.221–0.197 in bacterial and  
275 microeukaryotic communities, respectively), which indicates stochastic assembly. For  
276 bacteria, there was no clear pattern or trend in  $\beta_{RC}$  associated with the shift in the  
277 environmental conditions ( $\chi_{dry\ vs.\ wet} = 0.273, p = 0.602$ ) (Fig. 4). For microeukaryotes the  $\beta_{RC}$   
278 values decreased at the beginning of the wet-period, but thereafter they increased rapidly (Fig.  
279 4), although they remained within the ‘stochastic’ range ( $-0.95 < \beta_{RC} < +0.95$ ) ( $\chi_{dry\ vs.\ wet} =$   
280  $0.535, p = 0.465$ ).

281

### 282 ***Quantitative process estimates (QPE)***

283           The quantitative process estimates showed temporal variation over the study period  
284 with some differences between the two organism groups (Fig. 5). For bacteria, dispersal  
285 limitation or historical contingency was the dominant assembly processes (60.95–80.83% of  
286 all pairwise comparisons) followed by homogeneous selection processes (4.17–27.62%),  
287 random processes (drift, 4.76–15.38%), variable selection (0–12.5%) and homogenizing  
288 dispersal (0–1.67%). The relative proportion of homogeneous selection increased in the wet  
289 period ( $\chi_{dry\ vs.\ wet} = 5.34, p = 0.021$ ), while that of variable selection decreased compared to  
290 the dry period, although this decline was not significant ( $\chi_{dry\ vs.\ wet} = 1.32, p = 0.251$ ). There  
291 were no significant changes detected between the two periods in the case of dispersal  
292 limitation or historical contingency ( $\chi_{dry\ vs.\ wet} = 1.10, p = 0.293$ ), drift ( $\chi_{dry\ vs.\ wet} = 0.01, p =$   
293  $0.916$ ) and homogenizing dispersal ( $\chi_{dry\ vs.\ wet} = 0.05, p = 0.828$ ). For microeukaryotic  
294 metacommunities, dispersal limitation or historical contingency was also the dominating  
295 assembly process at all time points (56.19–85.83%). The second and third most dominant  
296 assembly processes were drift (5.00–22.86%) and variable selection (1.67–18.1%),  
297 respectively, whereas the proportions of homogeneous selection (0–2.86%) and

298 homogenizing dispersal (0–2.56%) were negligible. The proportion of dispersal limitation or  
299 historical contingency decreased ( $\chi_{\text{dry vs. wet}} = 5.77, p = 0.016$ ) while variable selection  
300 increased during the wet period after the first rainfall ( $\chi_{\text{dry vs. wet}} = 4.81, p = 0.028$ ), whereas  
301 the slight increase of drift during the wet-period was not significant ( $\chi_{\text{dry vs. wet}} = 2.81, p =$   
302 0.094). The importance of homogenizing dispersal differed between the two periods ( $\chi_{\text{dry vs. wet}}$   
303 = 4.51,  $p = 0.034$ ), while opposite to the bacterial metacommunities, homogeneous selection  
304 did not change significantly ( $\chi_{\text{dry vs. wet}} = 0.41, p = 0.522$ ) (Fig. 5).

305

306 Mantel correlations between community distance matrices ( $\beta_{\text{RCbray}}$ , the fraction  
307 retrieved for the second step of QPE) and geographical/environmental distance matrices were  
308 generally weak, showed no consistent pattern, and were only significant for a few time points  
309 (Fig. 6). Microeukaryotic communities showed significant correlations for geographic  
310 distance in one case and for both environmental and geographic distances in another. In the  
311 latter case the correlations were even significant when controlled for effects of covariation by  
312 environmental distance in cases of geographic distance (partial  $r_M = 0.23, p = 0.003$ ) or  
313 geographic distance in case of environmental distance (partial  $r_M = 0.19, p = 0.032$ ),  
314 respectively. Meanwhile, bacterial community compositions were significantly correlated to  
315 environmental distance only once.

316

317

## 318 **Discussion**

319

### 320 *Environmental dependency of assembly mechanisms*

321 Intensive rain from the middle of our rock pool sampling campaign separated the  
322 study period into a distinct dry and wet period, allowing us to specifically investigate the

323 environmental dependency of assembly mechanisms of microbial communities over time.  
324 According to the incidence-based beta-diversity ( $\beta_{RC}$ ) patterns, both bacterial and  
325 microeukaryotic communities were primarily stochastically assembled throughout the study  
326 period ( $\beta_{RC} \approx 0$ ) despite the observed environmental changes during the transition from the  
327 dry to the wet period. Testing the elements of metacommunity structure (EMS) provided  
328 further evidence for stochastic assembly. These results resonate the idea that microbial  
329 community assembly is unpredictable because stochastic occurrence patterns are due to rapid  
330 population dynamics [42]. However, in contrast to the results from the  $\beta_{RC}$  and EMS analyses,  
331 the quantitative process estimates (QPE) framework showed that both bacterial and  
332 microeukaryotic community assemblies were dominated by dispersal limitation or historical  
333 contingency at all time points. The relative importance of dispersal limitation or historical  
334 contingency in microeukaryotes was significantly higher in the dry period compared to the  
335 wet period, while in bacterial communities it increased towards the end of dry period, but then  
336 decreased slightly during the wet-period (Fig. 5). This suggests that a lack of connectivity  
337 among pools during the dry period lead to a temporary enforcement of dispersal limitation or  
338 history contingency (see discussion below for our interpretation). Further, the environmental  
339 shift between the dry and wet period slightly promoted the influence of homogeneous  
340 selection and variable selection for bacteria and microeukaryotes, respectively, even though  
341 none of the changes in environmental conditions that occurred throughout the study period  
342 induced strong selection processes.

343 While our study gives overall support for the dominance of stochastic and dispersal limitation  
344 or historical processes in the assembly of microbial communities, previous studies of bacterial  
345 communities in rock pools have shown that either both selection processes (i.e. species  
346 sorting) alone [43] or both environmental and spatial effects shape the communities [44].  
347 However, it has also been shown that the importance of environmental vs. spatial effects over

348 time varies in response to changes in environmental conditions [5]. Here, we provide a more  
349 refined picture of temporal changes in assembly processes that occur at much shorter  
350 temporal scales compared to the previous studies. Since community assembly is dynamic our  
351 temporal study provides a more comprehensive understanding of how microbial communities  
352 respond to environmental changes on short-time scales compared to previous snapshot studies  
353 [43, 44] or a study where changes were analysed over longer time periods as well as longer  
354 sampling intervals [5]. The present study also differs from the previous ones in that a broader  
355 suit of statistical methods was applied, allowing the analysis of further assembly mechanisms  
356 than in the studies where primarily variation partitioning was used [5, 45].

357

### 358 *Comparison of null model approaches*

359 Our results show that different null model approaches led to different conclusions  
360 about the dominant community assembly processes. Generally, the key differences among the  
361 applied three null model approaches are that EMS and  $\beta_{RC}$  are developed for detecting  
362 patterns in binary presence-absence matrices based on taxonomic beta-diversity estimates  
363 only, while the QPE framework is based on quantitative, abundance-based matrices  
364 integrating phylogenetic information. One possible explanation why selection processes were  
365 only detected by the QPE but not the non-quantitative methods (EMS and  $\beta_{RC}$ ) could be that  
366 species sorting is to a great extent related to changes in the relative abundances of species but  
367 not the replacement of species. This highlights that abundance-based metrics might be more  
368 suited to describe microbial beta-diversity and the underlying assembly mechanisms at spatial  
369 scales similar to those studied here [46, 47].

370

### 371 *Differences between bacterial and microeukaryotic communities*



372           Based on the results of null model approaches the hypothesis that bacteria and micro-  
373 eukaryotes are assembled by different assembly processes was partly supported. More  
374 specifically, the relative importance of assembly processes, and the way they changed in  
375 response to changing environmental conditions differed for bacterial and microeukaryotic  
376 communities. More specifically, for the bacterial metacommunity, there was a slight decrease  
377 in the influence of variable selection processes in the wet period compared to the previous dry  
378 period, while the relative importance of homogeneous selection processes significantly  
379 increased, which is conform with the idea that homogenization in environmental conditions  
380 among rock pools leads to more similarly composed bacterial communities [5]. On the  
381 contrary, for microeukaryotes, homogeneous selection processes remained negligible  
382 throughout the study period period, while the relative influence of variable selection  
383 surprisingly increased in the wet period. One possible explanation might be that in the wet  
384 period the increased water depth could have generated more gradients within each pool for  
385 environmental parameters such light, which is crucial for photo- and mixotrophic  
386 microeukaryotes [48, 49], thus, promoting the establishment of distinct local microeukaryotic  
387 communities. In general, it is worth to mention that both the bacterial and the microeukaryotic  
388 dataset consisted of several distinct groups of organisms which have very different population  
389 dynamics, niche-preferences and interspecific interactions (Fig. S5, S6). This could  
390 potentially mask important selection forces that act at each taxonomic level. More  
391 specifically, when a metacommunity consists of sets of species that are more structured by  
392 environment and others that are less so, a comprehensive perspective (pooling all groups  
393 together) could result in a fuzzy, stochastic picture of assembly [50]. Hence, a separate  
394 investigation of different microeukaryotic and bacterial groups (e.g. heterotrophs vs.  
395 autotrophs) might reveal different influences of assembly mechanisms [3].  
396

397 ***Historical contingency vs. pure dispersal limitation***

398 As mentioned earlier the quantitative process estimate analysis showed that both  
399 bacterial and microeukaryotic communities were primarily shaped by dispersal limitation or  
400 historical contingencies. At a first glance, the dominance of dispersal limitation seems  
401 surprising, given the idea that has persisted in microbiology for a long time that  
402 microorganisms are to a great extent not dispersal limited. This idea has now been challenged  
403 as many studies have, for instance, detected spatial distance effects for microorganism [5, 44,  
404 51, 52]. Moreover, other studies using quantitative process estimates have also shown  
405 considerable proportion of ‘dispersal limitation or historical contingency’ fraction [22, 53].  
406 However, problems related to the interpretation of dispersal limitation fraction have also been  
407 raised [54], because it does not purely reflect dispersal limitation but rather a number of  
408 different processes, such as historical contingency and effects of phylogenetically non-  
409 conserved selection processes. To more explicitly test whether pure dispersal limitation was  
410 present in our study, we used Mantel correlations of abundance-based Raup-Crick beta-  
411 diversity ( $\beta_{RC_{bray}}$ , on the fraction retrieved for the second step of QPE) vs. geographical  
412 distances between pools to detect spatial distance-decay relationships [55]. However, except  
413 for one case in microeukaryotes, this was not the case neither for bacteria nor for  
414 microeukaryotes (Fig 7) and we do therefore not have robust support for dispersal limitation.  
415 Likewise, there was also no indication that the dispersal limitation or historical contingency  
416 fraction masked substantial effects of phylogenetically non-conserved selection processes  
417 related to measured environmental factors as Mantel correlations between  $RC_{bray}$  and  
418 environmental distance were also not significant in most cases. Therefore, it seems most  
419 likely that the dispersal limitation or historical contingency fraction points to the importance  
420 of the outcome of historical contingency and the effect of unmeasured factors (e.g. light) that  
421 are not phylogenetically conserved. Evidence for historical contingency, such as priority

422 effects, would be a low temporal turnover in community composition at the level of  
423 individual rock pools despite the drastic environmental shift that occurred during the study  
424 period. In case of bacteria, most of the individual rock pools (9 out of 16) did not experience  
425 significant compositional shifts between the two periods. Hence, this suggests that these nine  
426 communities might have been influenced by priority effects, while the remaining pools might  
427 have been influenced by unmeasured environmental factors that are phylogenetically non-  
428 conserved. In contrast, microeukaryotic communities are unlikely to have experienced priority  
429 effects because most (15 out of 16) of the individual pools experienced significant  
430 compositional shift between the two periods (Table S2). Still, we could not explain these  
431 compositional shifts by spatial or measured environmental factors using Mantel tests (Fig. 6),  
432 suggesting that unmeasured environmental factors, such as light or trophic interactions are  
433 more important for microeukaryotes compared to bacteria. In summary caution needs to be  
434 taken when interpreting the results of quantitative process estimates and future refined  
435 statistical frameworks should integrate additional analyses such as those presented here to  
436 provide a more clear distinction of historical contingencies (e.g. priority effects),  
437 phylogenetically non-conserved selection and pure effects of dispersal limitation.

438

### 439 ***Conclusions***

440 Our results show that historical contingency and selection processes can play a key  
441 role in shaping microbial communities, but that the relative contribution of selection  
442 processes varies depending on the temporal variation of environmental heterogeneity and  
443 between bacteria and microeukaryotes. Furthermore, this present study highlighted that  
444 incidence-based and abundance-based null model approaches lead to different conclusions  
445 about the dominant community assembly process in microbial communities. Further, the  
446 outcomes of the current QPE framework act merely as a guide, because the fraction expected

447 to indicate dispersal limitation may in reality depict other processes such as historical  
448 contingency, phylogenetically non-conserved selection, or even other, unmeasured processes.  
449 Our findings also show that temporal observations with high-resolution can provide more a  
450 comprehensive understanding than snapshot studies. Taken together, we encourage future  
451 studies to consider temporal variation of metacommunities and its environmental dependency,  
452 regardless the microbial group of interest, as well as to consider historical contingency (e.g.  
453 imprints of assembly history) as a potentially important assembly process.

454

455

#### 456 **Acknowledgements**

457

458 We thank Christoffer Bergvall for laboratory guidance, Christian Stolpe for laboratory  
459 assistance, and David Spange for creation of the site map, furthermore, Ron Coleman, Javier  
460 Vargas Calle and Jan Johansson for their help during field sampling. This study was funded  
461 by the Swedish Research Council. Further financial support was received by grants to A.J.S  
462 from the Swedish Research Council Formas and a Marie Curie International Outgoing  
463 Fellowship within the 7th European Community Framework Programme.

464

465

#### 466 **Conflict of interest**

467 The authors declare that they have no conflict of interest.

468

469

#### 470 **References**

471

- 472 1. Leibold MA, Chase JM. Metacommunity ecology. 2017. Princeton University Press.
- 473 2. Stegen JC, Lin X, Konopka AE, Fredrickson JK. Stochastic and deterministic assembly  
474 processes in subsurface microbial communities. *ISME J* 2012; **6**: 1653–1664.
- 475 3. Yeh YC, Peres-Neto PR, Huang SW, Lai YC, Tu CY, Shiah FK, et al. Determinism of  
476 bacterial metacommunity dynamics in the southern East China Sea varies depending on  
477 hydrography. *Ecography (Cop)* 2015.
- 478 4. Dini-Andreote F, Stegen JC, van Elsas JD, Salles JF. Disentangling mechanisms that  
479 mediate the balance between stochastic and deterministic processes in microbial  
480 succession. *Proc Natl Acad Sci* 2015; **112**: E1326–E1332.
- 481 5. Langenheder S, Berga M, Östman Ö, Székely AJ. Temporal variation of  $\beta$ -diversity  
482 and assembly mechanisms in a bacterial metacommunity. *ISME J* 2012; **6**: 1107–1114.
- 483 6. Veach AM, Stegen JC, Brown SP, Dodds WK, Jumpponen A. Spatial and successional  
484 dynamics of microbial biofilm communities in a grassland stream ecosystem. *Mol Ecol*  
485 2016.
- 486 7. Wojciechowski J, Heino J, Bini LM, Padial AA. Temporal variation in phytoplankton  
487 beta diversity patterns and metacommunity structures across subtropical reservoirs.  
488 *Freshw Biol* 2017; **62**: 751–766.
- 489 8. Langenheder S, Lindström ES. Factors influencing aquatic and terrestrial bacterial  
490 community assembly. *Environ Microbiol Rep* 2019; **00**.
- 491 9. Viana DS, Figuerola J, Schwenk K, Manca M, Hobæk A, Mjelde M, et al. Assembly  
492 mechanisms determining high species turnover in aquatic communities over regional  
493 and continental scales. *Ecography (Cop)* 2016; **39**: 281–288.
- 494 10. Hawkes C V, Keitt TH. Resilience vs. historical contingency in microbial responses to  
495 environmental change. *Ecol Lett* 2015; **18**: 612–625.
- 496 11. Fukami T. Historical contingency in community assembly: integrating niches,

- 497 species pools, and priority effects. *Annu Rev Ecol Evol Syst* 2015; **46**: 1–23.
- 498 12. Vass M, Langenheder S. The legacy of the past: effects of historical processes on  
499 microbial metacommunities. *Aquat Microb Ecol* 2017; **79**: 13–19.
- 500 13. Andersson MGI, Berga M, Lindström ES, Langenheder S. The spatial structure of  
501 bacterial communities is influenced by historical environmental conditions. *Ecology*  
502 2014; **95**: 1134–1140.
- 503 14. Lindström ES, Östman Ö. The importance of dispersal for bacterial community  
504 composition and functioning. *PLoS One* 2011.
- 505 15. Stegen JC, Lin X, Fredrickson JK, Konopka AE. Estimating and mapping ecological  
506 processes influencing microbial community assembly. *Front Microbiol* 2015; **6**: 1–15.
- 507 16. Tripathi BM, Stegen JC, Kim M, Dong K, Adams JM, Lee YK. Soil pH mediates the  
508 balance between stochastic and deterministic assembly of bacteria. *ISME J* 2018; **12**:  
509 1072–1083.
- 510 17. Zhang X, Johnston ER, Liu W, Li L, Han X. Environmental changes affect the  
511 assembly of soil bacterial community primarily by mediating stochastic processes.  
512 *Glob Chang Biol* 2016; **22**: 198–207.
- 513 18. Chase JM. Stochastic Community Assembly Causes Higher Biodiversity in More  
514 Productive Environments. *Science (80- )* 2010; **328**: 1388–1391.
- 515 19. Liu L, Yang J, Yu X, Chen G, Yu Z. Patterns in the composition of microbial  
516 communities from a subtropical river: effects of environmental, spatial and temporal  
517 factors. *PLoS One* 2013; **8**: e81232.
- 518 20. Zhao D, Cao X, Huang R, Zeng J, Shen F, Xu H, et al. The heterogeneity of  
519 composition and assembly processes of the microbial community between different  
520 nutrient loading lake zones in Taihu Lake. *Appl Microbiol Biotechnol* 2017; 1–11.
- 521 21. Logares R, Tesson SVM, Canbäck B, Pontarp M, Hedlund K, Rengefors K.

- 522           Contrasting prevalence of selection and drift in the community structuring of bacteria  
523           and microbial eukaryotes. *Environ Microbiol* 2018; **20**: 2231–2240.
- 524   22.   Wu W, Lu H-P, Sastri A, Yeh Y-C, Gong G-C, Chou W-C, et al. Contrasting the  
525           relative importance of species sorting and dispersal limitation in shaping marine  
526           bacterial versus protist communities. *ISME J* 2017; 1–10.
- 527   23.   Brislawn CJ, Graham EB, Dana K, Ihardt P, Fansler SJ, Chrisler WB, et al. Forfeiting  
528           the priority effect: turnover defines biofilm community succession. *ISME J* 2019;  
529           1865–1877.
- 530   24.   Beisner BE, Peres-Neto PR, Lindström ES, Barnett A, Longhi ML. The role of  
531           environmental and spatial processes in structuring lake communities from bacteria to  
532           fish. *Ecology* 2006; **87**: 2985–91.
- 533   25.   De Bie T, De Meester L, Brendonck L, Martens K, Goddeeris B, Ercken D, et al. Body  
534           size and dispersal mode as key traits determining metacommunity structure of aquatic  
535           organisms. *Ecol Lett* 2012; **15**: 740–747.
- 536   26.   Gotelli NJ. Research frontiers in null model analysis. *Glob Ecol Biogeogr* 2001; **10**:  
537           337–343.
- 538   27.   Stegen JC, Lin X, Fredrickson JK, Chen X, Kennedy DW, Murray CJ, et al.  
539           Quantifying community assembly processes and identifying features that impose them.  
540           *ISME J* 2013; **7**: 2069–2079.
- 541   28.   Leibold MA, Mikkelsen GM. Coherence, species turnover, and boundary clumping:  
542           elements of meta-community structure. *Oikos* 2002; **97**: 237–250.
- 543   29.   Presley SJ, Higgins CL, Willig MR. A comprehensive framework for the evaluation of  
544           metacommunity structure. *Oikos* 2010; **119**: 908–917.
- 545   30.   Raup DM, Crick RE. Measurement of faunal similarity in paleontology. *J Paleontol*  
546           1979; **53**: 1213–1227.

- 547 31. Chase JM, Kraft NJB, Smith KG, Vellend M, Inouye BD. Using null models to  
548 disentangle variation in community dissimilarity from variation in  $\alpha$ -diversity.  
549 *Ecosphere* 2011; **2**: art24.
- 550 32. Gerhold P, Cahill JF, Winter M, Bartish I V., Prinzing A. Phylogenetic patterns are not  
551 proxies of community assembly mechanisms (they are far better). *Funct Ecol* 2015; **29**:  
552 600–614.
- 553 33. Cavender-Bares J, Kozak KH, Fine PVA, Kembel SW. The merging of community  
554 ecology and phylogenetic biology. *Ecol Lett* 2009; **12**: 693–715.
- 555 34. Jespersen A-M, Christoffersen K. Measurements of chlorophyll-a from phytoplankton  
556 using ethanol as extraction solvent. *Arch für Hydrobiol* 1987.
- 557 35. Székely AJ, Berga M, Langenheder S. Mechanisms determining the fate of dispersed  
558 bacterial communities in new environments. *ISME J* 2013; **7**: 61–71.
- 559 36. Herlemann DP, Labrenz M, Jürgens K, Bertilsson S, Waniek JJ, Andersson AF.  
560 Transitions in bacterial communities along the 2000 km salinity gradient of the Baltic  
561 Sea. *ISME J* 2011; **5**: 1571–1579.
- 562 37. Hugerth LW, Muller EEL, Hu YOO, Lebrun LAM, Roume H, Lundin D, et al.  
563 Systematic design of 18S rRNA gene primers for determining eukaryotic diversity in  
564 microbial consortia. *PLoS One* 2014; **9**: e95567.
- 565 38. R Core Team. R: A Language and Environment for Statistical Computing. *R Found*  
566 *Stat Comput Vienna Austria* . 2015. , **0**: {ISBN} 3-900051-07-0
- 567 39. Dormann CF, Elith J, Bacher S, Buchmann C, Carl G, Carré G, et al. Collinearity: a  
568 review of methods to deal with it and a simulation study evaluating their performance.  
569 *Ecography (Cop)* 2013; **36**: 27–46.
- 570 40. Oksanen J, Blanchet F, Kindt R, Legendre P, O’Hara R. Vegan: community ecology  
571 package. *R Packag* 23-3 . 2016. , Available at: <https://cran.r-project.org/web/packa>



- 572 41. Dallas T. Metacom: An R package for the analysis of metacommunity structure.  
573 *Ecography (Cop)* 2014; **37**: 402–405.
- 574 42. Soininen J, Korhonen JJ, Luoto M. Stochastic species distributions are driven by  
575 organism size. *Ecology* 2013; **94**: 660–670.
- 576 43. Székely AJ, Langenheder S. The importance of species sorting differs between habitat  
577 generalists and specialists in bacterial communities. *FEMS Microbiol Ecol* 2014; **87**:  
578 102–112.
- 579 44. Langenheder S, Ragnarsson H. The role of environmental and spatial factors for the  
580 composition of aquatic bacterial communities. *Ecology* 2007; **88**: 2154–2161.
- 581 45. Castillo-Escrivà A, Aguilar-Alberola JA, Mesquita-Joanes F. Spatial and  
582 environmental effects on a rock-pool metacommunity depend on landscape setting and  
583 dispersal mode. *Freshw Biol* 2017; **62**: 1004–1011.
- 584 46. Ulrich W, Gotelli NJ. Null model analysis of species associations using abundance  
585 data. *Ecology* 2010; **91**: 3384–3397.
- 586 47. Tucker CM, Shoemaker LG, Davies KF, Nemergut DR, Melbourne BA.  
587 Differentiating between niche and neutral assembly in metacommunities using null  
588 models of  $\beta$ -diversity. *Oikos* 2016; **125**: 778–789.
- 589 48. Modenutti BE, Balseiro EG, Callieri C, Bertoni R. Light versus food supply as factors  
590 modulating niche partitioning in two pelagic mixotrophic ciliates. *Limnol Oceanogr*  
591 2008.
- 592 49. Crane KW, Grover JP. Coexistence of mixotrophs, autotrophs, and heterotrophs in  
593 planktonic microbial communities. *J Theor Biol* 2010.
- 594 50. Leibold MA, Chase JM. Metacommunity Patterns in Space. *Metacommunity Ecology*.  
595 2017. Princeton Univ. Press, pp 90–130.
- 596 51. Martiny JBH, Eisen JA, Penn K, Allison SD, Horner-Devine MC. Drivers of bacterial

- 597           beta-diversity depend on spatial scale. *Proc Natl Acad Sci U S A* 2011; **108**: 7850–4.
- 598   52.   van der Gast CJ. Microbial biogeography: The end of the ubiquitous dispersal  
599           hypothesis? *Environ Microbiol* 2015; **17**: 544–546.
- 600   53.   Langenheder S, Wang J, Karjalainen SM, Laamanen TM, Tolonen KT, Vilmi A, et al.  
601           Bacterial metacommunity organization in a highly connected aquatic system. *FEMS*  
602           *Microbiol Ecol* 2017; **93**: 1–9.
- 603   54.   Zhou J, Ning D. Stochastic Community Assembly: Does It Matter in Microbial  
604           Ecology? *Microbiol Mol Biol Rev* 2017; **81**: 1–32.
- 605   55.   Martiny JBH, Bohannan BJM, Brown JH, Colwell RK, Fuhrman JA, Green JL, et al.  
606           Microbial biogeography: putting microorganisms on the map. *Nat Rev Microbiol* 2006;  
607           **4**: 102–112.
- 608
- 609

610 **Figure 1.** Flow chart of the statistical analyses performed in this study. (A) Redundancy  
611 analysis with forward selection was performed to select the most important environmental  
612 variables that explain variation in the community matrices. Then, we compared the variance  
613 and homogeneity of environmental and community distances between the dry and wet period  
614 using PERMANOVA and PERMDISP, respectively. (B-C-D) Three null-model approaches  
615 were applied. (B) EMS identifies metacommunity properties emerging in site-by-OTUs  
616 incidence matrix [28, 29]. (C) Incidence-based (Raup-Crick) beta-diversity ( $\beta_{RC}$ ) tests  
617 stochasticity and determinism using a metric provided by Chase et al. [31]. (D) QPE  
618 quantifies assembly processes involving phylogeny and abundance-based (Raup-Crick) beta-  
619 diversity ( $\beta_{RCbray}$ ) following the framework of Stegen et al. [27]. (E) We performed (partial)  
620 Mantel tests as a complement to the QPE between  $\beta_{RCbray}$  and geographical and environmental  
621 distance matrices in order make a clear distinction of historical contingencies (e.g. priority  
622 effects) and/or unmeasured factors, phylogenetically non-conserved selection and pure effects  
623 of dispersal limitation. Then, we distinguished historical contingency and the effects of  
624 unmeasured factors by assessing temporal change of community composition at the level of  
625 individual rock pool using PERMANOVA.

626

627 **Figure 2.** Temporal dynamics of the mean values and standard deviations of environmental  
628 variables that significantly affected either the composition of bacterial or the microeukaryotic  
629 communities (based on RDA) during the study period. The dashed line indicates rain that  
630 separated the study period into a dry and wet period.

631

632 **Figure 3.** Temporal variation of metacommunity types of the bacterial and microeukaryotic  
633 datasets. Within the dotted lines ( $-1.96 < \text{coherence z-value} < 1.96$ ) metacommunities are  
634 randomly structured. Positive significant values (coherence z-value  $> 1.96$ ) indicate that

635 species' distribution occur in response to environmental variation. Significantly negative  
636 coherence (coherence z-value < -1.96) indicates checkerboard distribution. The greyscale  
637 represents species turnover (z-value; number of observed replacements compared to a null  
638 distribution) where positive values indicate species replacements in response to environmental  
639 variation and negative values nested species distributions caused by species losses. The size  
640 of the symbols denotes the Morisita's index (boundary clumping) which shows the degree of  
641 spatial distribution of species in a metacommunity where lower numbers indicate over-  
642 dispersed boundaries and higher numbers clumped boundaries. Vertical dashed lines refer to  
643 the division between the dry and wet period.

644

645 **Figure 4.** Variation of incidence-based (Raup-Crick) beta-diversity ( $\beta_{RC}$ ) for bacteria and  
646 microeukaryotic communities during the study period. Dashed line refers to the division  
647 between dry and wet period.

648

649 **Figure 5.** Overall (A, B) and temporal (C, D) dynamics of the relative importance of different  
650 community assembly processes expressed as the proportion of community pairs assembled  
651 either by species-sorting (variable or homogeneous selection), dispersal limitation or  
652 historical contingency, homogenizing dispersal or drift for bacteria (A, C) and  
653 microeukaryotic (B, D) communities. Note that the scales are not equal on the C and D facet  
654 plot. The dashed lines refer to the division between the dry and wet period, and red asterisks  
655 indicate significant differences between them (Kruskal-Wallis test, significance at  $p < 0.05$   
656 level).

657

658 **Figure 6.** Mantel (Pearson) correlations between bacterial and microeukaryotic community  
659 dissimilarities (abundance-based Raup-Crick beta-diversity –  $\beta_{RCbray}$ ) and (A) environmental

660 and (B) geographic distances (Euclidean distances) for each sampling occasion. The dashed

661 lines refer to the division between dry and wet period.

662

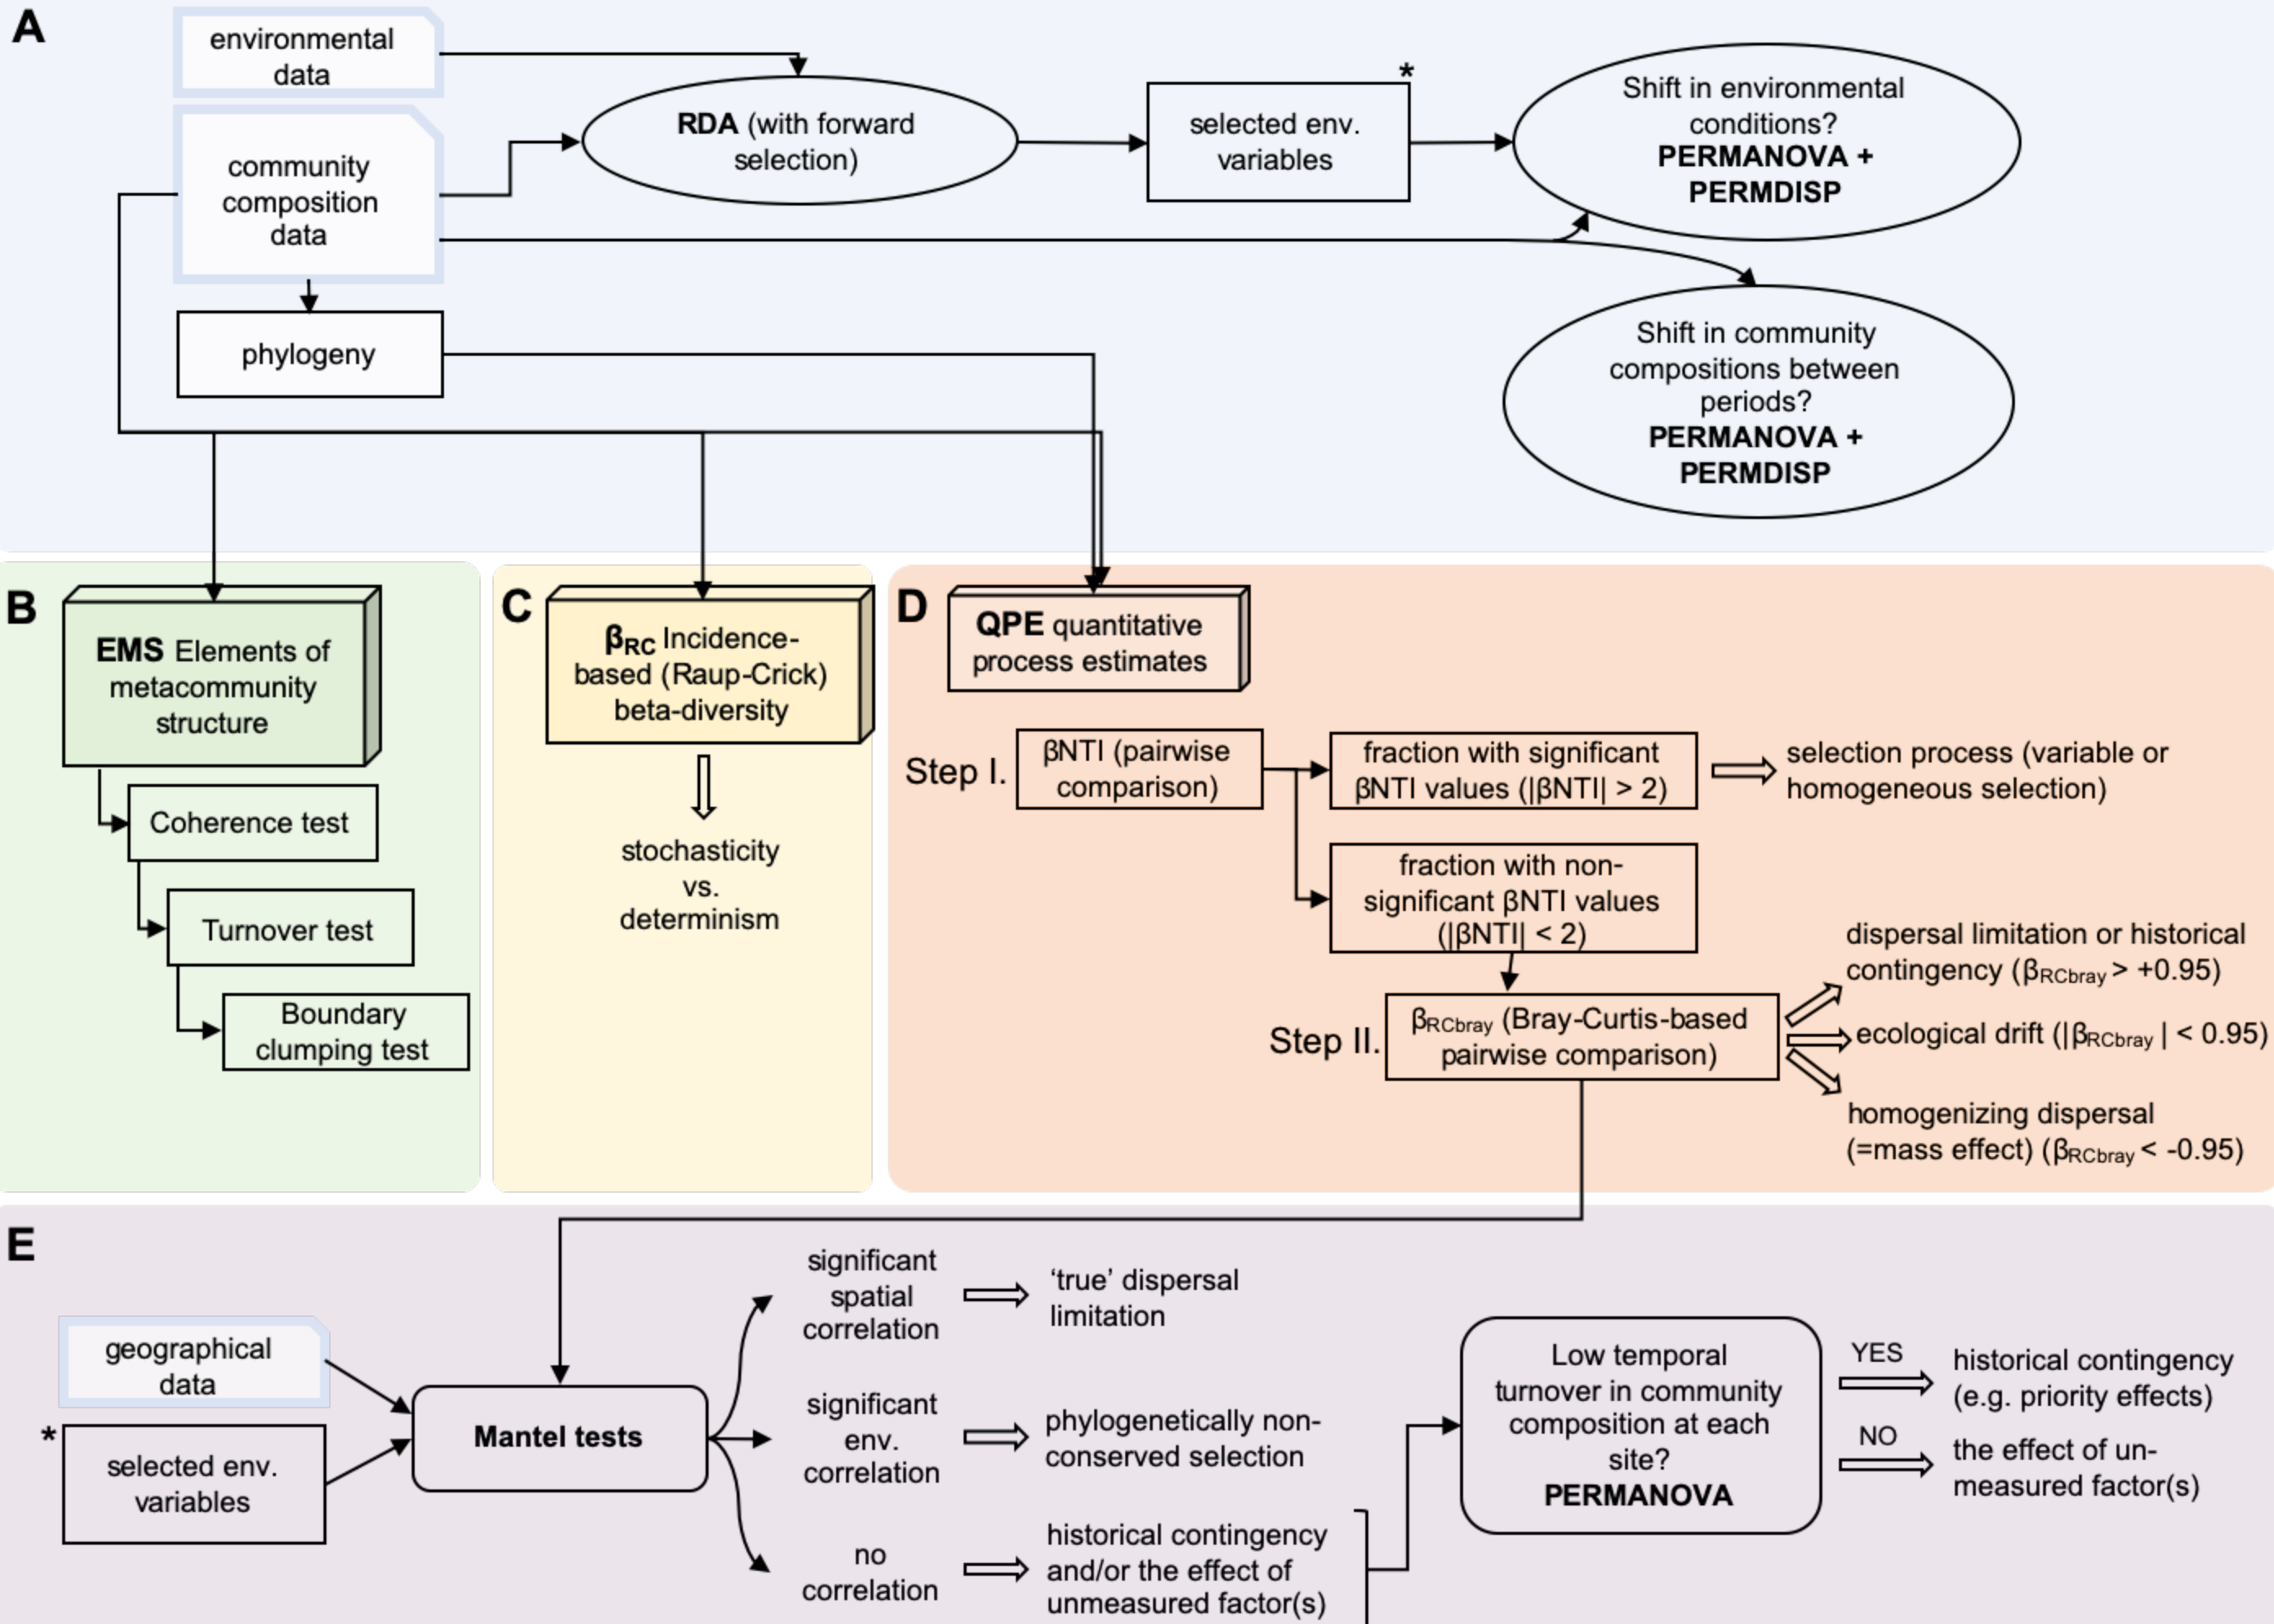

**Dry period****Wet period**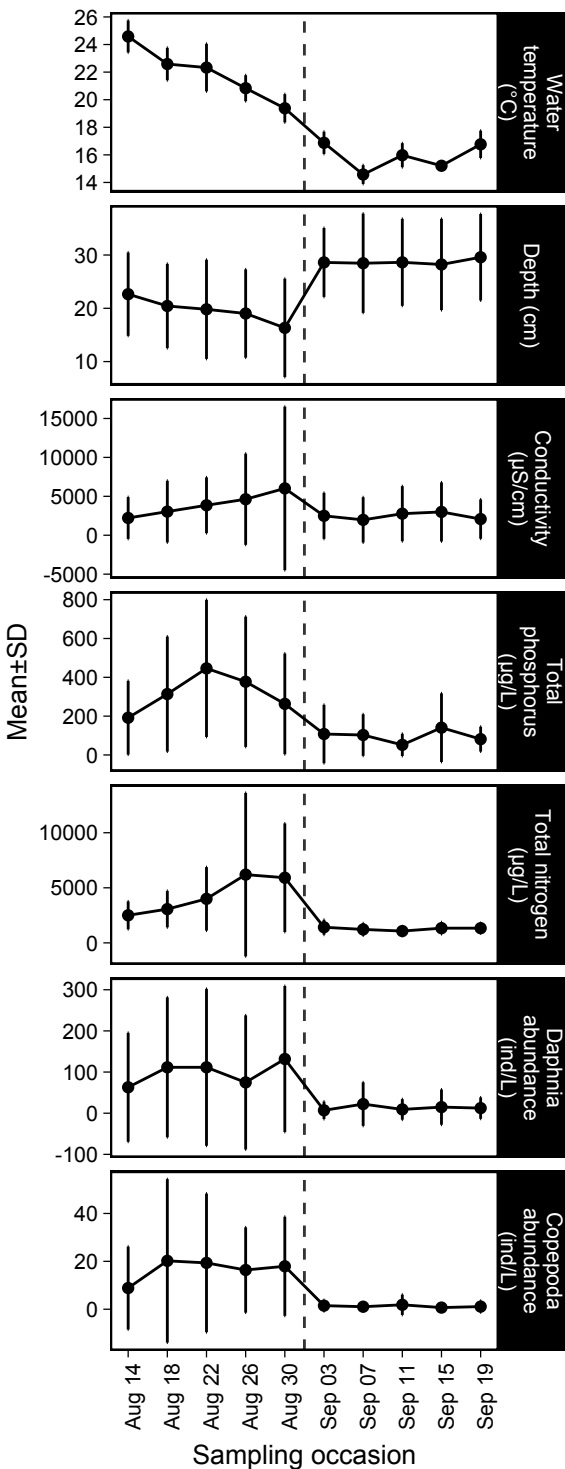

**Dry period****Wet period**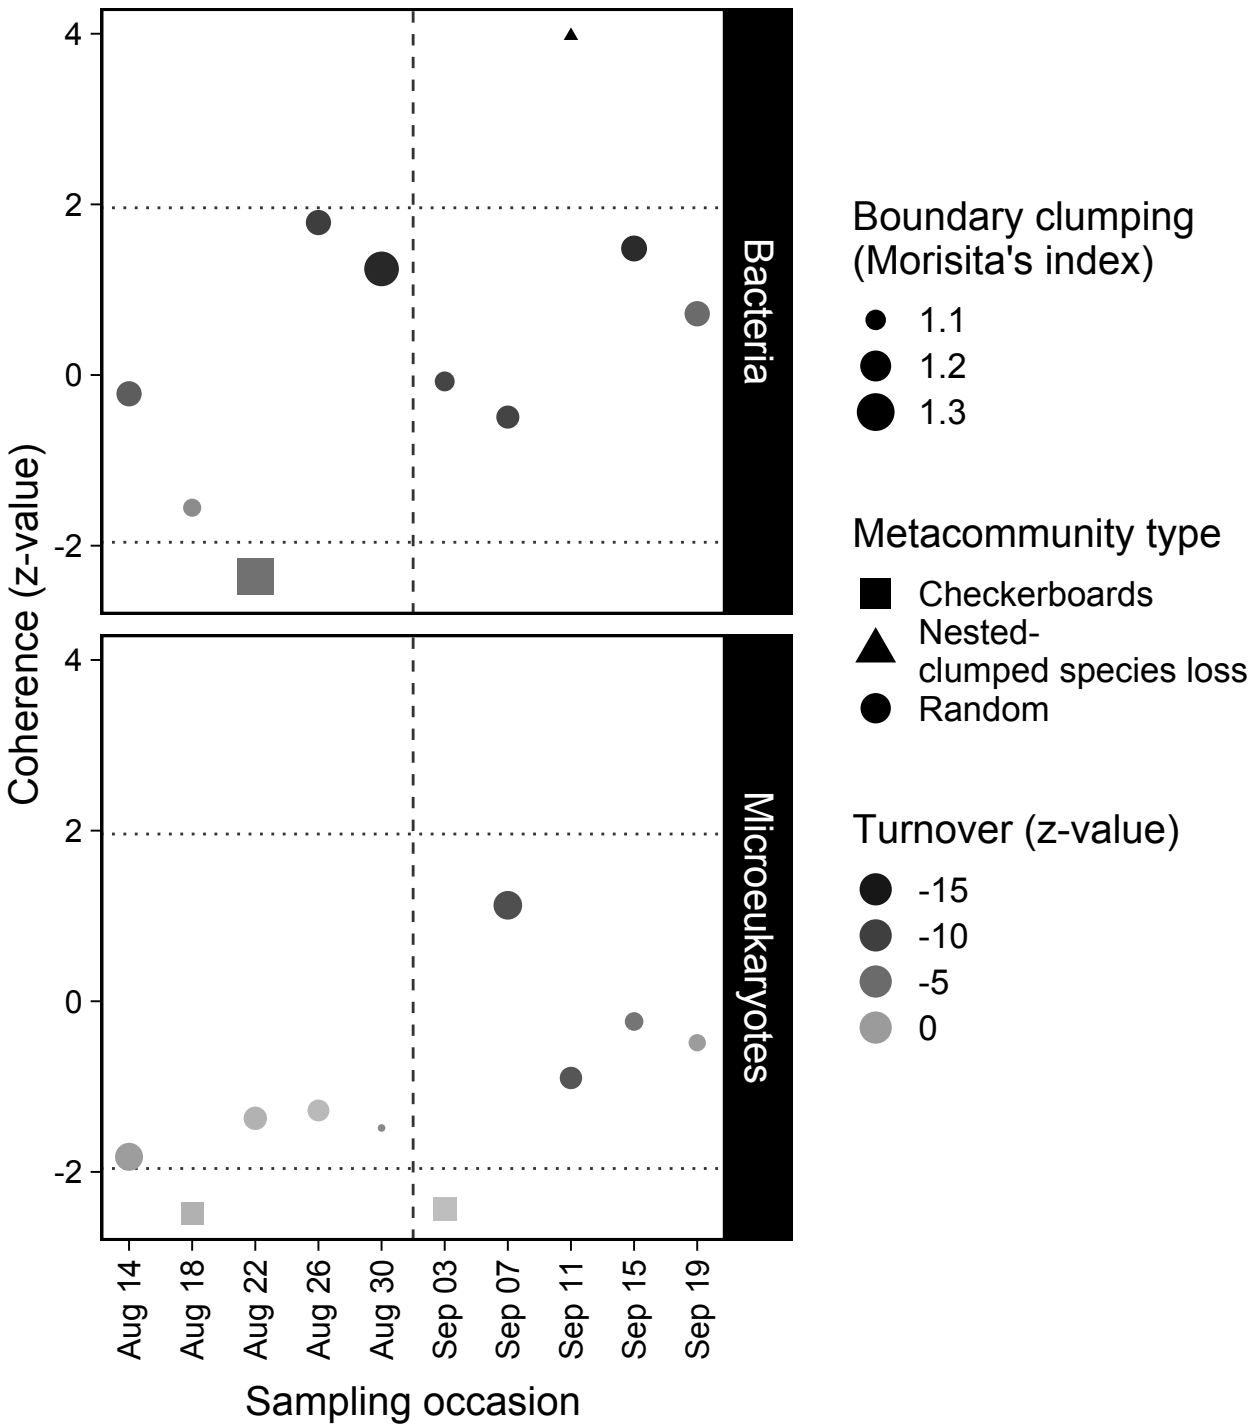



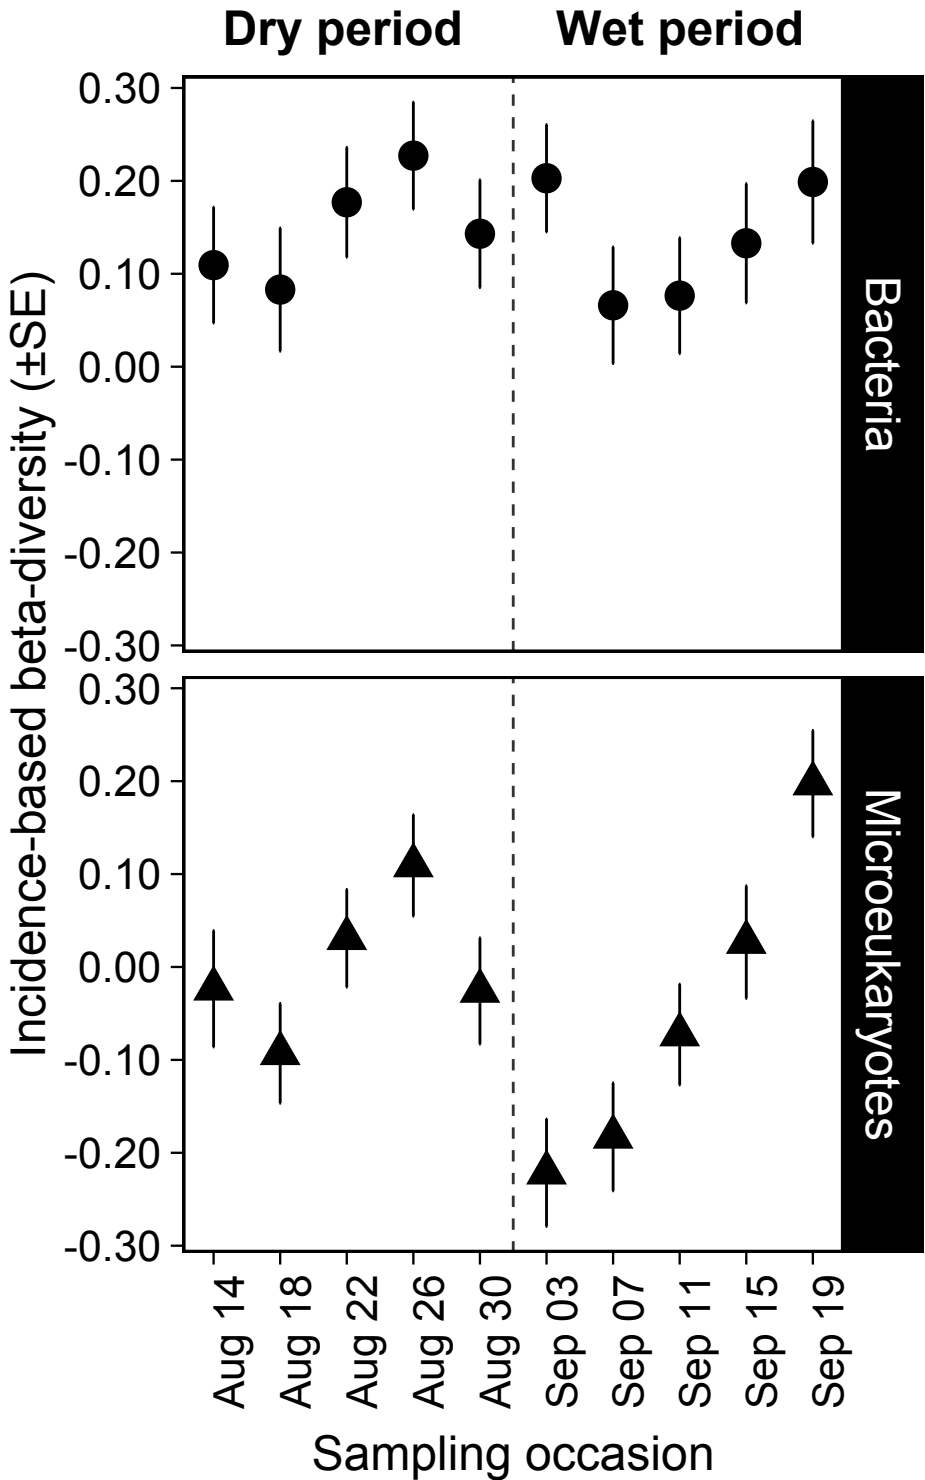

# Bacteria

A

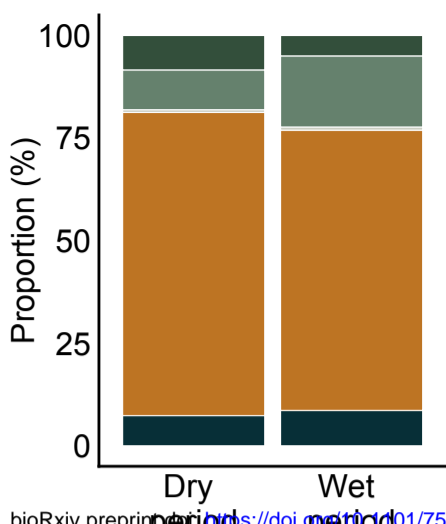

# Microeukaryotes

B

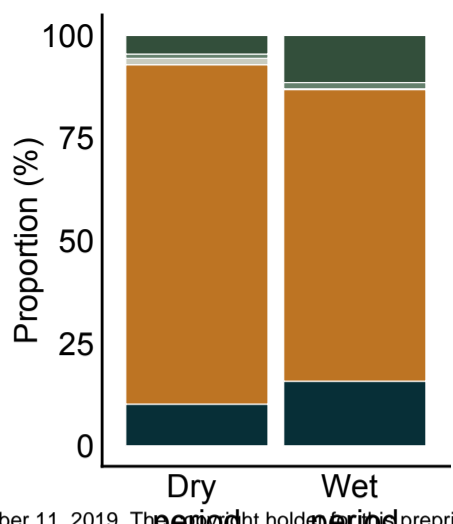

bioRxiv preprint doi: <https://doi.org/10.1101/752303>; this version posted September 11, 2019. The copyright holder for this preprint (which was not certified by peer review) is the author/funder, who has granted bioRxiv a license to display the preprint in perpetuity. It is made available under aCC-BY-NC-ND 4.0 International license.

C

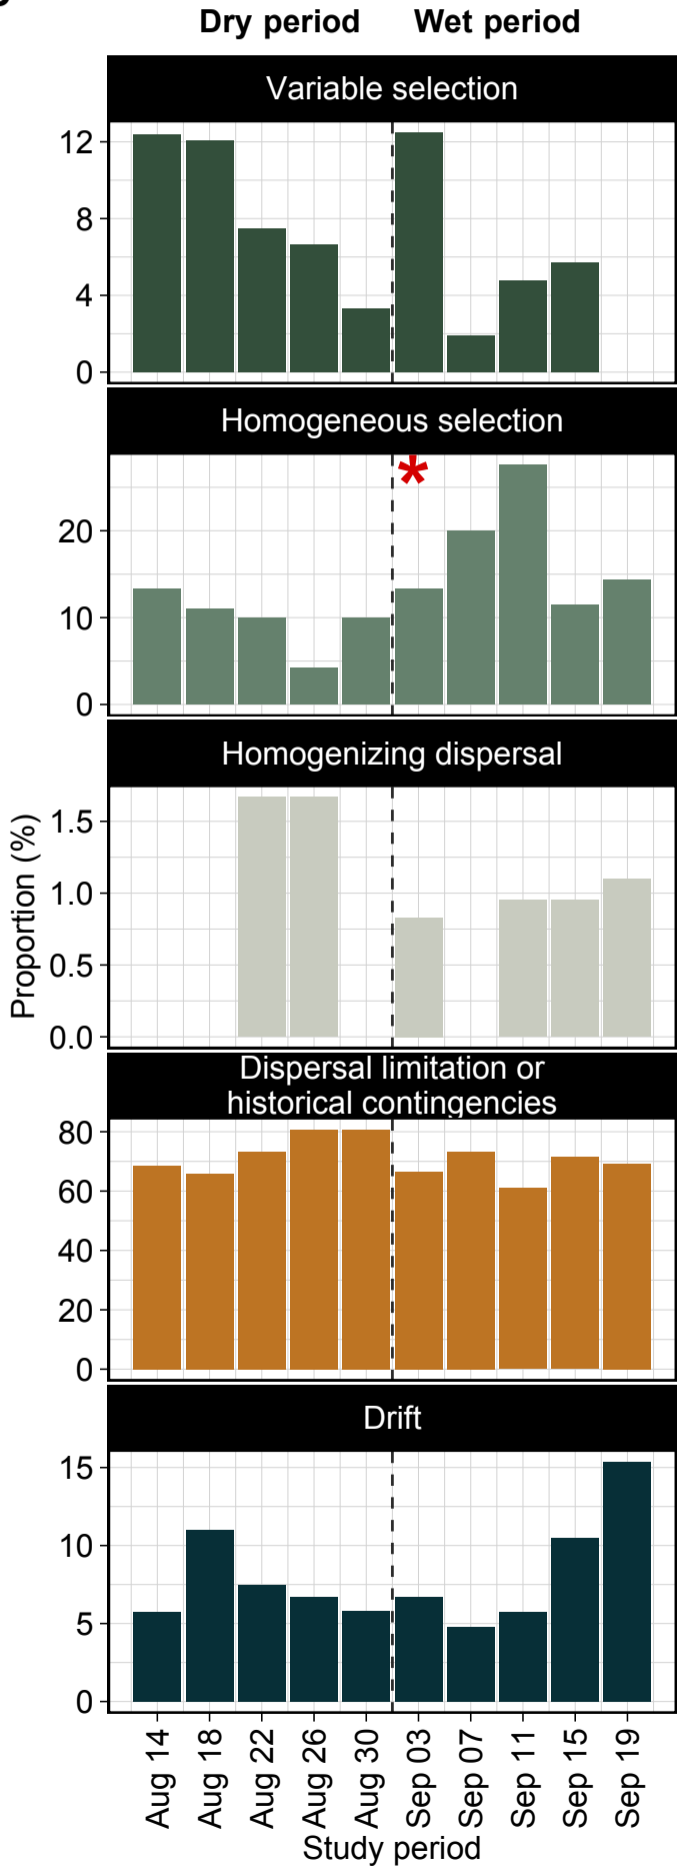

D

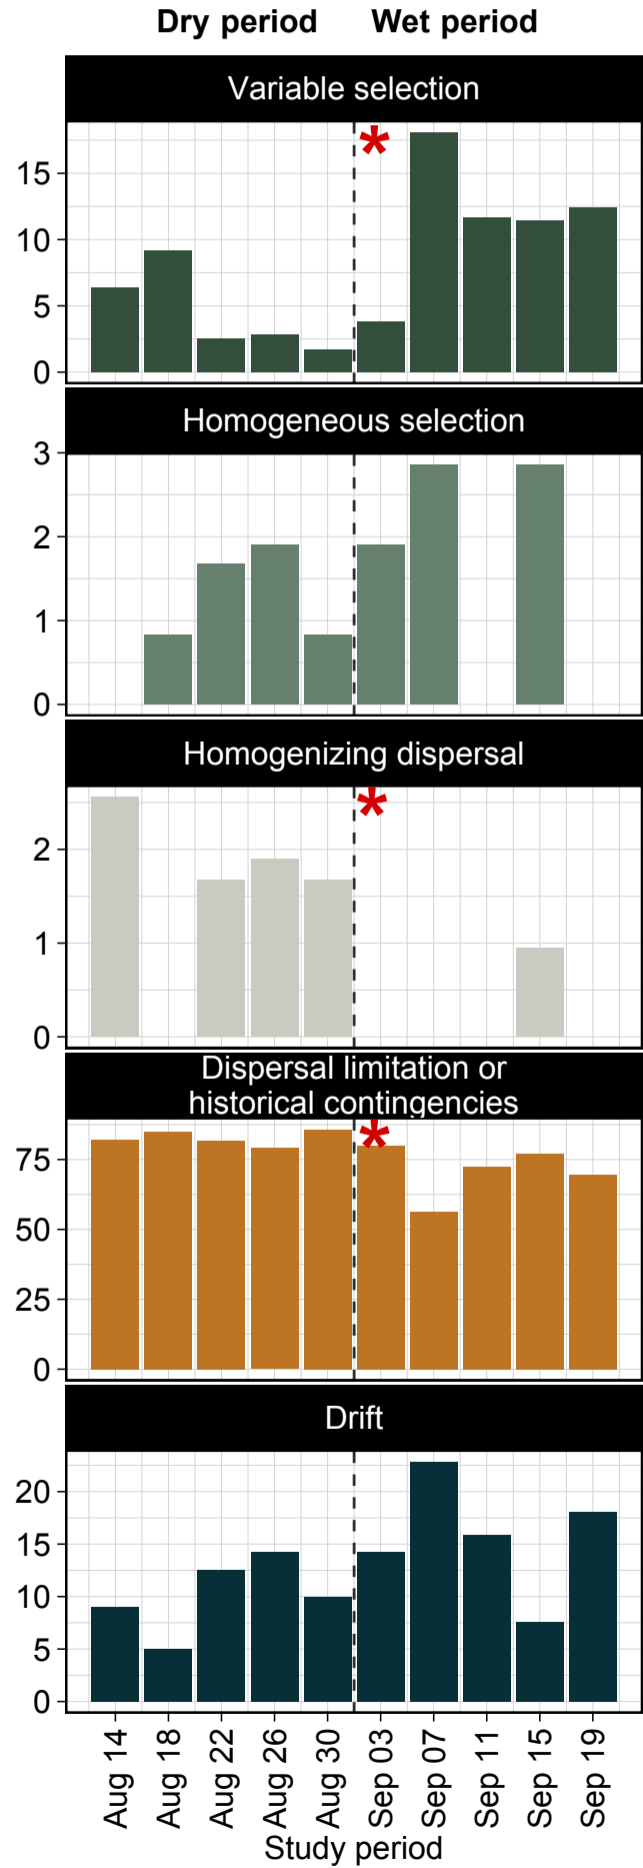

Variable selection
  Homogenizing dispersal
  Drift
  Homogeneous selection
  Dispersal limitation or historical contingencies

**A**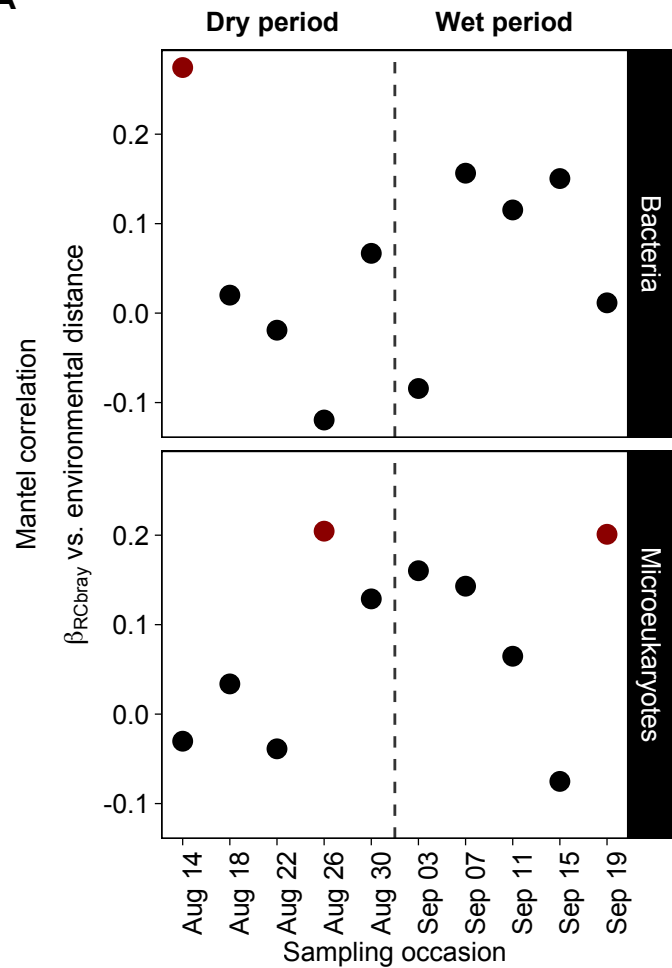**B**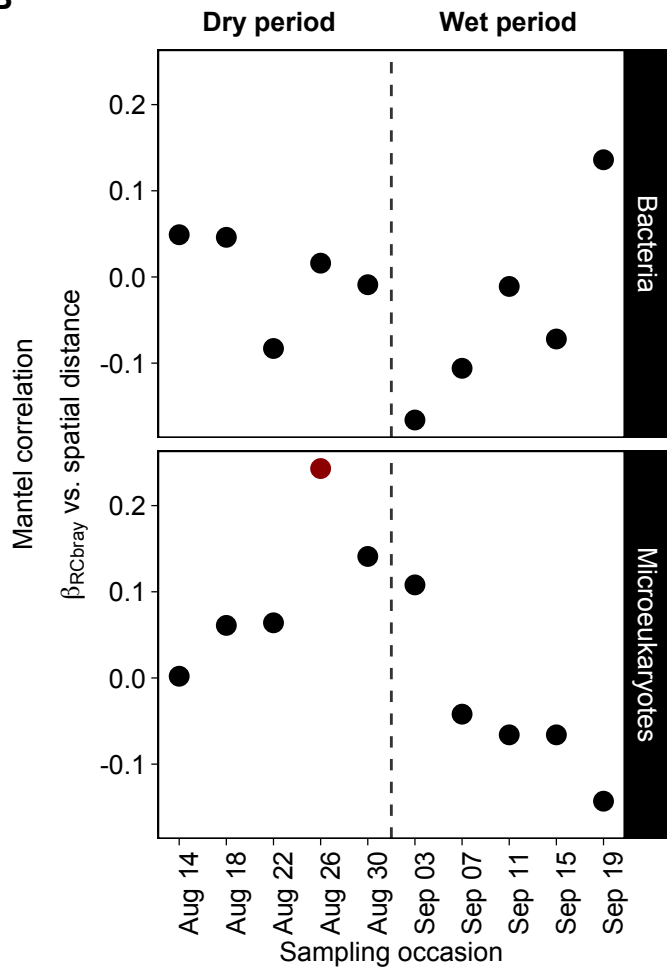

● significant    ● non-significant
